# Supplementary material
Source: PubMed Central journal article supplement (PMC4922085)
Supplement: JCM.00238-16_zjm999095045so1.pdf [file JCM.00238-16_zjm999095045so1.pdf]

TABLE S1 PCR Amplification Results and BLAST-Based Subtype Determination for HCV Genotype 5 and 6 NS3/4A, NS5A, and NS5B

| GenBank Accession(s)         | LiPA 2.0 Subtype | NS3/4A                                              |                                                  | NS5A                                                |                                                  | NS5B                                                |                                                  |
|------------------------------|------------------|-----------------------------------------------------|--------------------------------------------------|-----------------------------------------------------|--------------------------------------------------|-----------------------------------------------------|--------------------------------------------------|
|                              |                  | Nucleotide Coverage (Start Position – End Position) | BLAST <sup>a</sup> Analysis Subtype (Identity %) | Nucleotide Coverage (Start Position – End Position) | BLAST <sup>a</sup> Analysis Subtype (Identity %) | Nucleotide Coverage (Start Position – End Position) | BLAST <sup>a</sup> Analysis Subtype (Identity %) |
| KX107848, KX138234, KX107873 | 5                | 1 – 2055                                            | 5a (93)                                          | 1 – 1350                                            | 5a (90)                                          | 1 – 1764                                            | 5a (94)                                          |
| KX107849, KX138235, KX107874 | 5                | 1 – 2055                                            | 5a (92)                                          | 1 – 1350                                            | 5a (90)                                          | 1 - 1773                                            | 5a (94)                                          |
| KX107850, KX138236, KX107875 | 5                | 1 – 2055                                            | 5a (92)                                          | 1 – 1350                                            | 5a (90)                                          | 1 - 1764                                            | 5a (93)                                          |
| KX107851, KX138237, KX107876 | 5                | 1 – 2055                                            | 5a (92)                                          | 1 – 1350                                            | 5a (93)                                          | 1 - 1773                                            | 5a (94)                                          |
| KX107855, KX107866, KX107892 | 5a               | 1 - 2055                                            | 5a (92)                                          | 1 – 1350                                            | 5a (90)                                          | 1 – 1746 <sup>b</sup>                               | 5a (93)                                          |
| KX107859, KX138247, KX107885 | 5a               | 1 - 2055                                            | 5a (89)                                          | 1 – 1350                                            | 5a (87)                                          | 1 – 1773                                            | 5a (92)                                          |
| KX138233, KX107872           | 5                | N.A. <sup>c</sup>                                   | N.D. <sup>d</sup> (N.D. <sup>d</sup> )           | 1 – 1350                                            | 5a (91)                                          | 1 – 1773                                            | 5a (93)                                          |

|                                    |      |                   |                                           |          |         |                        |                                           |
|------------------------------------|------|-------------------|-------------------------------------------|----------|---------|------------------------|-------------------------------------------|
| KX107854,<br>KX107864,<br>KX107890 | 6a/b | 1 - 2055          | 6a (92)                                   | 1 – 1353 | 6a (91) | 1 – 1740 <sup>b</sup>  | 6a (94)                                   |
| KX107860,<br>KX138248,<br>KX107886 | 6a/b | 1 – 2055          | 6e (92)                                   | 1 – 1353 | 6e (90) | 1 – 1773               | 6e (95)                                   |
| KX107861,<br>KX138249,<br>KX107887 | 6a/b | 1 - 2055          | 6a (92)                                   | 1 – 1353 | 6a (90) | 1 – 1773               | 6a (94)                                   |
| KX107853,<br>KX138245,<br>KX107882 | 6c-1 | 1 – 2055          | 6e (89)                                   | 1 – 1353 | 6e (88) | 1 – 1773               | 6e (92)                                   |
| KX107852,<br>KX138241              | 6    | 1 – 2055          | 6a (95)                                   | 1 – 1350 | 6a (94) | N.A. <sup>c</sup>      | N.D. <sup>d</sup><br>(N.D. <sup>d</sup> ) |
| KX138238,<br>KX107878              | 6    | N.A. <sup>c</sup> | N.D. <sup>d</sup><br>(N.D. <sup>d</sup> ) | 1 – 1353 | 6n (96) | 1 – 1773               | 6n (97)                                   |
| KX138239,<br>KX107879              | 6    | N.A. <sup>c</sup> | N.D. <sup>d</sup><br>(N.D. <sup>d</sup> ) | 1 – 1353 | 6f (92) | 1 – 1773               | 6f (95)                                   |
| KX138240,<br>KX107880              | 6    | N.A. <sup>c</sup> | N.D. <sup>d</sup><br>(N.D. <sup>d</sup> ) | 1 – 1353 | 6n (93) | 1 – 1746               | 6n (97)                                   |
| KX107870,<br>KX107896              | 6    | N.A. <sup>c</sup> | N.D. <sup>d</sup><br>(N.D. <sup>d</sup> ) | 1 – 1368 | 6e (90) | 1 – 1758 <sup>b</sup>  | 6e (94)                                   |
| KX107869,<br>KX107895              | 6    | N.A. <sup>c</sup> | N.D. <sup>d</sup><br>(N.D. <sup>d</sup> ) | 1 – 1368 | 6e (88) | 1 – 1773 <sup>b</sup>  | 6e (93)                                   |
| KX107871,<br>KX107897              | 6    | N.A. <sup>c</sup> | N.D. <sup>d</sup><br>(N.D. <sup>d</sup> ) | 1 – 1368 | 6e (89) | 1 – 1746 <sup>b</sup>  | 6e (93)                                   |
| KX107867,<br>KX107893              | 6    | N.A. <sup>c</sup> | N.D. <sup>d</sup><br>(N.D. <sup>d</sup> ) | 1 – 1338 | 6e (92) | 1 – 1107 <sup>b</sup>  | 6e (93)                                   |
| KX107868,<br>KX107894              | 6    | N.A. <sup>c</sup> | N.D. <sup>d</sup><br>(N.D. <sup>d</sup> ) | 1 – 1356 | 6o (91) | 1 – 1749 <sup>b</sup>  | 6o (94)                                   |
| KX107865,                          | 6c-1 | N.A. <sup>c</sup> | N.D. <sup>d</sup>                         | 1 – 1356 | 6j (84) | 72 – 1764 <sup>b</sup> | 6j (89)                                   |

|                       |      |                   |                                           |                   |                                           |                       |                                           |
|-----------------------|------|-------------------|-------------------------------------------|-------------------|-------------------------------------------|-----------------------|-------------------------------------------|
| KX107891              |      |                   | (N.D. <sup>d</sup> )                      |                   |                                           |                       |                                           |
| KX107862,<br>KX107888 | 6c-1 | N.A. <sup>c</sup> | N.D. <sup>d</sup><br>(N.D. <sup>d</sup> ) | 1 – 1368          | 6e (87)                                   | 1 – 1611 <sup>b</sup> | 6e (91)                                   |
| KX107863,<br>KX107889 | 6c-1 | N.A. <sup>c</sup> | N.D. <sup>d</sup><br>(N.D. <sup>d</sup> ) | 1 – 1353          | 6a (91)                                   | 1 – 1740 <sup>b</sup> | 6a (94)                                   |
| KX138243,<br>KX107881 | 6c-1 | N.A. <sup>c</sup> | N.D. <sup>d</sup><br>(N.D. <sup>d</sup> ) | 1 – 1353          | 6l (94)                                   | 1 – 1773              | 6l (95)                                   |
| KX138246,<br>KX107883 | 6c-1 | N.A. <sup>c</sup> | N.D. <sup>d</sup><br>(N.D. <sup>d</sup> ) | 1 – 1353          | 6a (92)                                   | 1 – 1773              | 6a (94)                                   |
| KX107858              | 6a/b | 1 - 2055          | 6a (95)                                   | N.A. <sup>c</sup> | N.D. <sup>d</sup><br>(N.D. <sup>d</sup> ) | N.A. <sup>c</sup>     | N.D. <sup>d</sup><br>(N.D. <sup>d</sup> ) |
| KX107856              | 6c-1 | 1 - 2055          | 6l (93)                                   | N.A. <sup>c</sup> | N.D. <sup>d</sup><br>(N.D. <sup>d</sup> ) | N.A. <sup>c</sup>     | N.D. <sup>d</sup><br>(N.D. <sup>d</sup> ) |
| KX107857              | 6c-1 | 1 – 2055          | 6l (93)                                   | N.A. <sup>c</sup> | N.D. <sup>d</sup><br>(N.D. <sup>d</sup> ) | N.A. <sup>c</sup>     | N.D. <sup>d</sup><br>(N.D. <sup>d</sup> ) |
| KX138242              | 6c-1 | N.A. <sup>c</sup> | N.D. <sup>d</sup><br>(N.D. <sup>d</sup> ) | 1 - 1353          | 6p (90)                                   | N.A. <sup>c</sup>     | N.D. <sup>d</sup><br>(N.D. <sup>d</sup> ) |
| KX138244              | 6c-1 | N.A. <sup>c</sup> | N.D. <sup>d</sup><br>(N.D. <sup>d</sup> ) | 1 - 1332          | 6e (89)                                   | N.A. <sup>c</sup>     | N.D. <sup>d</sup><br>(N.D. <sup>d</sup> ) |
| KX107877              | 6    | N.A. <sup>c</sup> | N.D. <sup>d</sup><br>(N.D. <sup>d</sup> ) | N.A. <sup>c</sup> | N.D. <sup>d</sup><br>(N.D. <sup>d</sup> ) | 1 – 1773              | 6i (96)                                   |
| KX107884              | 6c-1 | N.A. <sup>c</sup> | N.D. <sup>d</sup><br>(N.D. <sup>d</sup> ) | N.A. <sup>c</sup> | N.D. <sup>d</sup><br>(N.D. <sup>d</sup> ) | 1 – 1773              | 6e (91)                                   |

All subtypes determined by BLAST were, also, confirmed by phylogenetic analysis.

<sup>a</sup> BLAST, basic local alignment search tool

<sup>b</sup> Only population sequence was available.

<sup>c</sup> N.A., not available

<sup>d</sup> N.D., not determined
